# Supplementary material
Source: PubMed Central journal article supplement (PMC4787866)
Supplement: jhap662072.ww1_default.pdf [file jhap662072.ww1_default.pdf]

## **Web appendix A.RGI-CGHR MILLION DEATH STUDY: COLLABORATORS**

### **Indian Academic Partners (in alphabetical order):**

1. Clinical Epidemiology Resource and Training Centre, Trivandarum: KB Leena, KT Shenoy (until 2005)
2. Department of Community Medicine, Gujarat Medical College, Ahmedabad: DV Bala, P Seth, KN Trivedi
3. Department of Community Medicine, Kolkatta Medical College, Kolkatta: SK Roy
4. Department of Community Medicine, Osmania Medical College, Hyderabad: P Bhatia
5. Department of Community Medicine, Regional Institute of Medical Sciences, Imphal: L Usharani
6. Department of Community Medicine, S.C.B. Medical College, Cuttack, Orissa: Dr. B Mohapatra
7. Department of Community Medicine, SMS Medical College, Jaipur: AK Bharadwaj, R Gupta
8. Epidemiological Research Center, Chennai: V Gajalakshmi, CV Kanimozhi
9. Gandhi Medical College, Bhopal: RP Dikshit, S Sorangi
10. Healis-Seskarhia Institute of Public Health, Mumbai: PC Gupta, MS Pednekar, S Sreevidya
11. Institute of Health Systems Research, Hyderabad: P Mahapatra (until 2004)
12. St. John's Research Institute, St. John's Academy of Health Sciences, Bangalore: A Kurpad, P Mony, M Vaz, R Jotkar, S Rao-Seshadri, S Shrihari
13. King George Medical College, Lucknow: S Awasthi
14. Najafgarh Rural Health Training Centre, Ministry of Health, Government of India, New Delhi: N Dhingra, J Sudhir, I Rawat
15. National Institute of Mental Health and Neurosciences, Bangalore: G Gururaj (until 2004)
16. North Eastern Indira Gandhi Institute of Regional Medical Sciences, Shillong, Meghalaya: FU Ahmed (until 2005), DK Parida
17. Regional Medical Research Center, ICMR Institute, Bhubaneshwar: AS Karketta, SK Dar
18. School of Preventative Oncology, Patna: DN Sinha
19. School of Public Health, Post Graduate Institute of Medical Education and Research, Chandigarh: N Kaur, R Kumar, JS Thakur
20. Tata Memorial Hospital, Mumbai: RP Dikshit

### **Lead Partners:**

1. Office of the Registrar-General, India, RK Puram, New Delhi, India: C Chandramouli (Registrar General of India [RGI]), RC Sethi, B Mishra, S Jain (until 2008), DK Dey, AK Saxena, MS Thapa, Nitish Kumar, JK Banthia and DK Sikri (former RGIs).
2. Million Death Study Coordinating Centre, Centre for Global Health Research(CGHR), Li Ka Shing Knowledge Institute, Keenan Research Centre, St. Michael's Hospital, Dalla Lana School of Public Health, University of Toronto, Canada: DG Bassani, P Jha (Principal Investigator), R Jotkar, D Kam, R Kamadod, P Mony, S Rao-Seshadri, J Sudhir, W Suraweera.

### **Affiliated Partners:**

1. Clinical Trial Service Unit and Epidemiological Studies Unit (CTSU), University of Oxford, England: J Boreham, Z Chen, J Godwin, R Collins, R Peto
2. Indian Council of Medical Research, New Delhi, India: NK Ganguly (DG until 2008), Dr. VM Katoch (DG from 2008), L Kant, B Bhattacharya
3. School of Population Health, The University of Queensland, Australia: AD Lopez, C Rao
4. World Health Organisation, Geneva and SEARO Office, New Delhi: T Boerma, T Evans, A Fric, S Habayeb (WHO Representative-India), S Khanum, C Mathers, N Singh, P Singh (Deputy Regional Director), DN Sinha
