# Supplementary material
Source: PubMed Central journal article supplement (PMC4787866)
Supplement: jhap662072.ww2_default.pdf [file jhap662072.ww2_default.pdf]

## Web appendix B

### Footnote to table 5

Assuming median survival time of 10 years,<sup>19,30</sup> and Weibull survival distribution with index 2 (widely used model for survival after HIV infection before introduction of antiretroviral drugs), survival function  $S(t)=\exp(-(t/12)^2)$ . If the number of incident infections increase with an annual rate of  $\gamma$  (e.g. if one assumes that the prevalence remains constant, then  $\gamma$  would equal the adult population growth rate, i.e. approximately 0.02). Then one can show (using simple calculus) that the ratio of deaths (D) to HIV infections (I) is  $D/I = 1/\{\exp(36\gamma^2)\sqrt{(144\pi)\Phi(-\gamma\sqrt{72})}\} - \gamma$ , where  $\Phi()$  denotes the standard normal distribution function. For  $\gamma=-0.05, -0.02, 0, 0.02, 0.05$  D/I would equal 0.1147, 0.1017, 0.0940 (i.e. 1/life expectancy), 0.0871, 0.0780 respectively.
